# Supplementary material
Source: publisher figshare collection journal article supplement (https://karger.figshare.com/ndownloader/files/30806770)
Supplement: Supplementary file 1 [file 30806770]

**Supplementary Table 6. Distribution differences in PIM use between men and women classified by ATC classification system 1st level group**

| ATC-group | Number of PIMs used by men  (N=166) | Number of PIMs used by women  (N=236) | P-value | Number of PIMs overall  (N=402) |
| --- | --- | --- | --- | --- |
| Alimentary tract and metabolism  Ranitidine  Mebeverine  Metoclopramide1  Alizapride1  Sodium picosulfate  Aloe  Glibenclamide  Glimepiride  Sitagliptine  Vildagliptine | 25 (15.1%)  4 (2.4%)  -  1 (0.6%)  -  -  -  2 (1.2%)  11 (6.6%)  6 (3.6%)  1 (0.6%) | 22 (9.3%)  2 (0.8%)  2 (0.8%)  4 (1.7%)  1 (0.4%)  2 (0.8%)  1 (0.4%)  2 (0.8%)  5 (2.1%)  2 (0.8%)  1 (0.4) | 0.078 | 47 (11.7%)  6 (1.5%)  2 (0.5%)  5 (1.2%)  1 (0.2%)  2 (0.5%)  1 (0.2%)  4 (1.0%)  16 (4.0%)  8 (2.0%)  2 (0.5%) |
| Blood and blood forming organs  Dipyridamole  Dabigatran  Rivaroxaban | 4 (2.4%)  1 (0.6%)  2 (1.2%)  1 (0.6%) | 2 (0.8%)  -  1 (0.4%)  1 (0.4% | - | 6 (1.5%)  1 (0.2%)  3 (0.7%)  2 (0.5%) |
| Cardiovascular system  Digitoxin  Digoxin  Flecainide  Amiodarone  Dronedarone  Moxonidine  Doxazosin  Spironolactone (>25mg/d)  Aescin  Propranolol  Sotalol  Nifedipine  Verapamil  Niacin | 34 (20.5%)  6 (3.6%)  -  2 (1.2%)  2 (1.2%)  -  -  2 (1.2%)  6 (3.6%)  1 (0.6%)  2 (1.2%)  1 (0.6%)  4 (2.4%)  6 (3.6%)  2 (1.2%) | 30 (12.7%)  1 (0.4%)  1 (0.4%)  -  -  1 (0.4%)  6 (2.5%)  2 (0.8%)  2 (0.8%)  -  2 (0.8%)  -  2 (0.8%)  12 (5.1%)  1 (0.4%) | 0.036* | 64 (15.9%)  7 (1.7%)  1 (0.2%)  2 (0.5%)  2 (0.5%)  1 (0.2%)  6 (1.5%)  4 (1.0%)  8 (2.0%)  1 (0.2%)  4 (1.0%)  1 (0.2%)  6 (1.5%)  18 (4.5%)  3 (0.7%) |
| Genito-urinary system, sex hormones  Estrogens (oral)  Oxybutynine1  Tolterodine1  Solifenacin1  Trospium1  Darifenacin1  Fesoterodin1 | 10 (6.0%)  -  -  1 (0.6%)  3 (1.8%)  3 (1.8%)  2 (1.2%)  1 (0.6%) | 46 (19.5%)  37 (15.7%)  3 (1.3%)  1 (0.4%)  2 (0.8%)  1 (0.4%)  2 (0.8%)  - | < 0.001* | 56 (13.9%)  37 (9.2%)  3 (0.7%)  2 (0.5%)  5 (1.2%)  4 (1.0%)  4 (1.0%)  1 (0.2%) |
| Musculo-skeletal system  Indometacin  Diclofenac  Meloxicam  Ibuprofen (>3*400mg/d or longer than one week)  Ketoprofen  Celecoxib  Etoricoxib  Tetrazepam1 | 38 (22.9%)  1 (0.6%)  22 (13.3%)  -  6 (3.6%)  1 (0.6%)  1 (0.6%)  5 (3.0%)  2 (1.2%) | 61 (25.8%)  2 (0.8%)  37 (15.7%)  3 (1.3%)  10 (4.2%)  -  3 (1.3%)  5 (2.1%)  1 (0.4%) | 0.498 | 99 (24.6%)  3 (0.7%)  59 (14.7%)  3 (0.7%)  16 (6.8%)  1 (0.2%)  4 (1.0%)  10 (2.5%)  3 (0.7%) |
| Nervous system  Tramadol  Acetylsalicylic acid (>325mg/d)  Triptanes  Clonazepam1  Ropinirole  Pramipexole  Cabergoline  Piribedil  Rotigotine  Olanzapine1 (>10mg/d)  Lithium  Diazepam1  Bromazepam1  Lormetazepam1 (>0.5mg/d)  Zopiclone1 (> 3.75mg/d)  Zolpidem1 (> 5mg/d)  Clomipramine1  Trimipramine1  Amitriptyline1  Doxepin1  Fluoxetine  Paroxetine  Bupropion  Venlafaxine  Piracetam  Ginkgo biloba | 50 (30.1%)  1 (0.6%)  7 (4.2%)  2 (1.2%)  2 (1.2%)  -  2 (1.2%)  1 (0.6%)  1 (0.6%)  -  1 (0.6%)  2 (1.2%)  1 (0.6%)  -  -  1 (0.6%)  2 (1.2%)  -  1 (0.6%)  2 (1.2%)  1 (0.6%)  4 (2.4%)  1 (0.6%)  -  7 (4.2%)  -  11 (6.6%) | 67 (28.4%)  4 (1.7%)  11 (4.7%)  4 (1.7%)  1 (0.4%)  1 (0.4%)  1 (0.4%)  -  -  2 (0.8%)  -  1 (0.4%)  3 (1.3%)  1 (0.4%)  1 (0.4%)  2 (0.8%)  4 (1.7%)  1 (0.4%)  2 (0.8%)  4 (1.7%)  4 (1.7%)  2 (0.8%)  1 (0.4%)  1 (0.4%)  3 (1.3%)  1 (0.4%)  12 (5.1%) | 0.707 | 117 (29.1%)  5 (1.2%)  18 (4.5%)  6 (1.5%)  3 (0.7%)  1 (0.2%)  3 (0.7%)  1 (0.2%)  1 (0.2%)  2 (0.5%)  1 (0.2%)  3 (0.7%)  4 (1.0%)  1 (0.2%)  1 (0.2%)  3 (0.7%)  6 (1.5%)  1 (0.2%)  3 (0.7%)  6 (1.5%)  5 (1.2%)  6 (1.5%)  2 (0.5%)  1 (0.2%)  10 (2.5%)  1 (0.2%)  23 (5.7%) |
| Respiratory system  Theophylline  Diphenhydramine1  Doxylamine1  Dimetindene1  Promethazine1 | 5 (3.0%)  2 (1.2%)  2 (1.2%)  1 (0.6%)  -  - | 8 (3.4%)  1 (0.4%)  2 (0.8%)  3 (1.3%)  1 (0.4%)  1 (0.4%) | 0.833 | 13 (3.2%)  3 (0.7%)  4 (1.0%)  4 (1.0%)  1 (0.2%)  1 (0.2%) |
| Overall substances with anticholinergic effects | 27 (16.3%) | 45 (19.1%) | 0.471 | 72 (17.9%) |

Notes and abbreviations; ATC-group 1st level, chemical substances and numbers of PIMs used by men and women, 1anticholinergic side effects possible (EU(7)-PIM).

ATC, Anatomical Therapeutic Chemical
